# Supplementary material for: A conserved role of bam in maintaining metabolic homeostasis via regulating intestinal microbiota in Drosophila
Source: PeerJ. 2022 Oct 10;10:e14145. doi: 10.7717/peerj.14145 (PMC9559046; doi:10.7717/peerj.14145)
Supplement: Data S1 [file peerj-10-14145-s003.xls]

## Sheet: Sheet1
1A
	bam+/+	bam+/-	bam-/-			bam+/+	bam+/-	bam-/-			bam+/+	bam+/-	bam-/-
10day	1.03	1.14	1.25		10day	1.05	0.75	1.19		10day	0.87	1.31	1.3
30day	0.86	0.89	1.36		30day	0.72	1.06	1.12		30day	0.93	0.81	0.95
50day	0.58	1.03	1.29		50day	0.87	0.78	1.22		50day	0.76	1.02	1.18
1B
	bam+/+	bam+/-	bam-/-			bam+/+	bam+/-	bam-/-			bam+/+	bam+/-	bam-/-
10day	0.33	0.29	0.31		10day	0.42	0.37	0.41		10day	0.37	0.31	0.39
30day	0.35	0.34	0.37		30day	0.26	0.38	0.43		30day	0.33	0.29	0.35
50day	0.28	0.31	0.35		50day	0.23	0.25	0.38		50day	0.26	0.25	0.31
1C
	bam+/+	bam+/-	bam-/-			bam+/+	bam+/-	bam-/-			bam+/+	bam+/-	bam-/-
10day	1.51	1.42	1.45		10day	1.38	1.35	1.44		10day	1.33	1.32	1.47
30day	1.27	1.01	1.49		30day	1.35	1.19	1.53		30day	1.31	1.14	1.43
50day	1.04	0.76	1.23		50day	0.83	1.09	1.15		50day	0.66	0.96	1.29
1D
	bam+/+	bam+/-	bam-/-			bam+/+	bam+/-	bam-/-			bam+/+	bam+/-	bam-/-
10day	0.18	0.15	0.15		10day	0.13	0.17	0.19		10day	0.14	0.14	0.18
30day	0.17	0.14	0.17		30day	0.16	0.16	0.15		30day	0.12	0.15	0.16
50day	0.09	0.11	0.16		50day	0.09	0.08	0.17		50day	0.07	0.09	0.18
2A
		bam	RP49	BAM-rp49	rel
	WB	20.2364	18.66	1.57641	1
	FB	18.9117	17.21	1.70165	0.916852
	Head	19.9131	17.89	2.02311	0.733719
	Gut	17.4564	17.52	-0.0636	3.11668
	Thorax	19.77	17.612	2.158	0.668227
	Ro	15.8461	17.5651	-1.71899	9.8178
		bam	RP49	BAM-rp49	rel
	WB	21.6541	15.6121	6.04198	1
	FB	21.5564	15.2212	6.3352	0.816079
	Head	23.196	16.1256	7.07036	0.49026
	Gut	19.686	15.6964	3.9896	4.1479
	Thorax	23.914	15.5665	8.34749	0.202289
	Ro	17.9561	15.354	2.6021	10.8519
		bam	RP49	BAM-rp49	rel
	WB	22.641	16.6565	5.98446	1
	FB	23.04	16.554	6.486	0.706352
	Head	21.655	15.09	6.565	0.668713
	Gut	20.644	15.91	4.734	2.37917
	Thorax	24.16	16.1633	7.9967	0.247888
	Ro	18.616	16.344	2.272	13.1088
2C
	Control	Nos>Bam KD	Ppl>Bam KD	NP1>Bam KD	Elav>Bam KD			Control	Nos>Bam KD	Ppl>Bam KD	NP1>Bam KD	Elav>Bam KD			Control	Nos>Bam KD	Ppl>Bam KD	NP1>Bam KD	Elav>Bam KD
10day	1.05	1.13	0.93	1.16	1.13		10day	1.11	1.08	1.06	1.18	1.17		10day	1.02	1.18	0.95	1.13	1.15
30day	0.75	0.81	0.66	1.06	0.85		30day	0.96	0.83	0.61	1.11	0.78		30day	0.78	0.72	0.67	1.09	0.76
50day	0.63	0.71	0.58	1.03	0.67		50dy	0.58	0.66	0.61	0.98	0.56		50day	0.68	0.61	0.59	0.89	0.62
2D
	Control	Nos>Bam KD	Ppl>Bam KD	NP1>Bam KD	Elav>Bam KD			Control	Nos>Bam KD	Ppl>Bam KD	NP1>Bam KD	Elav>Bam KD			Control	Nos>Bam KD	Ppl>Bam KD	NP1>Bam KD	Elav>Bam KD
10day	0.43	0.41	0.38	0.43	0.39		10day	0.36	0.34	0.35	0.38	0.42		10day	0.37	0.36	0.39	0.45	0.41
30day	0.33	2.28	0.35	0.41	0.31		30day	0.31	0.36	0.29	0.39	0.33		30day	0.28	0.27	0.38	0.42	0.32
50day	0.22	0.23	0.25	0.37	0.28		50dy	0.28	0.25	0.24	0.35	0.29		50day	0.25	0.21	0.28	0.41	0.31
2E
			bam	RP49	BAM-rp49	rel
	NP1>+;bam+/+		19.5654	15.3615	4.20388	1
	NP1>+;bam‐/‐		22.09	15.644	6.446	0.211375
	NP1>bam;bam‐/‐		19.64	15.7544	3.8856	1.24684
			bam	RP49	BAM-rp49	rel
	NP1>+;bam+/+		20.66	16.06	4.6	1
	NP1>+;bam‐/‐		23.05	16.64	6.41	0.285191
	NP1>bam;bam‐/‐		20.31	15.89	4.42	1.13288
			bam	RP49	BAM-rp49	rel
	NP1>+;bam+/+		19.564	15.51	4.054	1
	NP1>+;bam‐/‐		21.64	15.136	6.504	0.183011
	NP1>bam;bam‐/‐		19.57	15.71	3.86	1.14393
2G
	NP1>+;bam+/+	NP1>+;bam-/-	NP1>bam;bam-/-					NP1>+;bam+/+	NP1>+;bam-/-	NP1>bam;bam-/-					NP1>+;bam+/+	NP1>+;bam-/-	NP1>bam;bam-/-
10day	1.28	1.25	1.07				10day	1.15	1.31	0.98				10day	1.12	1.27	1.03
30day	0.95	1.05	1.02				30day	0.77	1.09	1.07				30day	0.86	1.13	0.96
50day	0.58	1.03	0.51				50dy	0.62	1.05	0.55				50day	0.56	0.89	0.52
2H
	NP1>+;bam+/+	NP1>+;bam-/-	NP1>bam;bam-/-					NP1>+;bam+/+	NP1>+;bam-/-	NP1>bam;bam-/-					NP1>+;bam+/+	NP1>+;bam-/-	NP1>bam;bam-/-
10day	0.42	0.45	0.39				10day	0.45	0.44	0.38				10day	0.41	0.42	0.43
30day	0.35	0.41	0.31				30day	0.28	0.39	0.29				30day	0.32	0.38	0.28
50day	0.17	0.27	0.16				50dy	0.15	0.31	0.18				50day	0.16	0.28	0.16
3A
		16s	RP49	16s-rp49	rel
	bam+/+10	17.511	16.6833	0.827723	1
	bam+/-10	16.41	15.8682	0.54177	1.21922
	bam-/-10	15.63	15.8169	-0.186875	2.02034
	bam+/+30	13.04	16.574	-3.53398	20.559
	bam+/-30	13.49	16.5428	-3.05275	14.7278
	bam-/-30	11.65	16.5946	-4.94465	54.6584
	bam+/+50	10.91	15.3127	-4.40265	37.5405
	bam+/-50	10.91	15.4962	-4.58621	42.634
	bam-/-50	10.03	15.44	-5.41	75.4643
		16s	RP49	16s-rp49	rel
	bam+/+10	21.06	15.8551	5.20485	1
	bam+/-10	21.14	16.0008	5.13923	1.04654
	bam-/-10	20.36	16.3796	3.98039	2.33669
	bam+/+30	17.06	16.2389	0.821107	20.8756
	bam+/-30	16.93	15.8496	1.0804	17.4415
	bam-/-30	15.56	16.234	-0.673973	58.8441
	bam+/+50	15.77	15.6621	0.10787	34.2251
	bam+/-50	15.41	15.5844	-0.1744	41.6213
	bam-/-50	14.99	16.01	-1.02	74.794
		16s	RP49	16s-rp49	rel
	bam+/+10	20.6546	16.1414	4.51319	1
	bam+/-10	20.14	15.7227	4.41735	1.06869
	bam-/-10	19.0154	15.7769	3.23854	2.4194
	bam+/+30	15.7041	15.8252	-0.12113	24.8353
	bam+/-30	15.62	15.3058	0.314158	18.3668
	bam-/-30	13.895	15.261	-1.36601	58.8594
	bam+/+50	14.721	15.4621	-0.7411	38.1679
	bam+/-50	14.091	14.9663	-0.8753	41.8887
	bam-/-50	13.39	15.05	-1.66	72.1631
3B
		Bacilli	RP49	Bacilli-rp49	rel
	bam+/+10	18.631	16.6833	1.94772	1
	bam+/-10	17.83	15.8682	1.96177	0.990311
	bam-/-10	16.11	15.8169	0.293125	3.14835
	bam+/+30	16.36	16.574	-0.213976	4.47442
	bam+/-30	17.06	16.5428	0.517249	2.69535
	bam-/-30	15.01	16.5946	-1.58465	11.5704
	bam+/+50	14.48	15.3127	-0.832654	6.87032
	bam+/-50	14.5201	15.4962	-0.97611	7.5886
	bam-/-50	13.46	15.44	-1.98	15.2182
		Bacilli	RP49	Bacilli-rp49	rel
	bam+/+10	21.87	16.1414	5.72864	1
	bam+/-10	21.98	15.7227	6.25735	1.025
	bam-/-10	20.54	15.7769	4.76314	3.61618
	bam+/+30	20.14	15.8252	4.31477	4.32813
	bam+/-30	20.55	15.3058	5.24416	2.48708
	bam-/-30	18.5041	15.261	3.24309	13.4052
	bam+/+50	18.71	15.4621	3.2479	7.81899
	bam+/-50	18.81	14.9663	3.8437	6.91271
	bam-/-50	18.09	15.05	3.04	16.2936
		Bacilli	RP49	Bacilli-rp49	rel
	bam+/+10	19.6448	15.8551	3.78965	1
	bam+/-10	19.53	16.0008	3.52923	1.19783
	bam-/-10	18.41	16.3796	2.03039	3.38526
	bam+/+30	18.05	16.2389	1.81111	3.94095
	bam+/-30	18.07	15.8496	2.2204	2.96751
	bam-/-30	16.33	16.234	0.0960266	12.9387
	bam+/+50	16.6	15.6621	0.93787	7.21891
	bam+/-50	16.43	15.5844	0.8456	7.69569
	bam-/-50	16.04	16.01	0.03	13.5447
3C		Gab	RP49	Gab-rp49	rel
	bam+/+10	23.57	16.6833	6.88672	1
	bam+/-10	22.6041	15.8682	6.73591	1.11019
	bam-/-10	22.45	15.8169	6.63313	1.19218
	bam+/+30	19.1216	16.574	2.54758	20.24
	bam+/-30	19.36	16.5428	2.81725	16.7894
	bam-/-30	18.2494	16.5946	1.65475	37.582
	bam+/+50	17.01	15.3127	1.69735	36.4887
	bam+/-50	16.97	15.4962	1.47379	42.6045
	bam-/-50	15.77	15.44	0.33	94.1392
		Gab	RP49	Gab-rp49	rel
	bam+/+10	22.756	16.1414	6.90085	1
	bam+/-10	22.71	15.7227	6.70923	1.14205
	bam-/-10	22.87	15.7769	6.49039	1.32911
	bam+/+30	18.72	15.8252	2.48111	21.403
	bam+/-30	18.5636	15.3058	2.714	18.2124
	bam-/-30	17.79	15.261	1.55603	40.6399
	bam+/+50	17.322	15.4621	1.65987	37.8175
	bam+/-50	16.8912	14.9663	1.3068	48.3034
	bam-/-50	16.276	15.05	0.266	99.3778
		Gab	RP49	Gab-rp49	rel
	bam+/+10	19.4451	15.8551	3.58995	1
	bam+/-10	19.541	16.0008	3.54023	1.03507
	bam-/-10	19.325	16.3796	2.94539	1.56327
	bam+/+30	15.5172	16.2389	-0.721693	19.8579
	bam+/-30	15.22	15.8496	-0.6296	18.6299
	bam-/-30	14.4507	16.234	-1.78327	41.4478
	bam+/+50	14.0523	15.6621	-1.60981	36.7523
	bam+/-50	13.7223	15.5844	-1.86207	43.7746
	bam-/-50	13.1421	16.01	-2.86788	87.9025
3D		Gab	RP49	Gab-rp49	rel
	bam+/+10	21.5441	16.6833	4.86082	1
	bam+/-10	21.37	15.8682	5.50177	0.641292
	bam-/-10	20.16	15.8169	4.34313	1.43167
	bam+/+30	17.64	16.574	1.06602	13.8787
	bam+/-30	17.26	16.5428	0.717249	17.6742
	bam-/-30	17.7621	16.5946	1.16745	12.9365
	bam+/+50	15.8052	15.3127	0.492578	20.6525
	bam+/-50	15.636	15.4962	0.13979	26.3738
	bam-/-50	16.04	15.44	0.6	19.1706
		Gab	RP49	Gab-rp49	rel
	bam+/+10	20.644	15.8551	4.78885	1
	bam+/-10	21.05	16.0008	5.04923	0.834871
	bam-/-10	20.95	16.3796	4.57039	1.1635
	bam+/+30	17.04	16.2389	0.801107	15.8647
	bam+/-30	16.5429	15.8496	0.69328	17.0958
	bam-/-30	17.554	16.234	1.32003	11.0719
	bam+/+50	16.0152	15.6621	0.35308	21.6421
	bam+/-50	15.6314	15.5844	0.047	26.7571
	bam-/-50	16.654	16.01	0.644	17.6899
		Gab	RP49	Gab-rp49	rel
	bam+/+10	21.1245	16.1414	4.98318	1
	bam+/-10	21.2549	15.7227	5.53229	0.683444
	bam-/-10	20.171	15.7769	4.39414	1.50425
	bam+/+30	16.9126	15.8252	1.08733	14.8857
	bam+/-30	16.0525	15.3058	0.746608	18.8511
	bam-/-30	16.5245	15.261	1.26344	13.1751
	bam+/+50	16.054	15.4621	0.5919	20.985
	bam+/-50	15.3591	14.9663	0.392821	24.09
	bam-/-50	15.9033	15.05	0.853254	17.5079
3E
	bam+/+	bam+/-	bam-/-			bam+/+	bam+/-	bam-/-			bam+/+	bam+/-	bam-/-
10day	1.2	1.12	0.93		10day	0.97	1.09	1.03		10day	1.08	1.05	1.01
30day	0.95	0.89	1.01		30day	0.88	0.89	0.94		30day	0.91	0.96	0.98
50day	0.88	0.84	0.86		50day	0.78	0.81	0.92		50day	0.81	0.79	0.75
3F
	bam+/+	bam+/-	bam-/-			bam+/+	bam+/-	bam-/-			bam+/+	bam+/-	bam-/-
10day	0.55	0.52	0.49		10day	0.49	0.58	0.51		10day	0.52	0.61	0.53
30day	0.38	0.38	0.37		30day	0.41	0.39	0.41		30day	0.39	0.42	0.39
50day	0.35	0.29	0.35		50day	0.33	0.31	0.31		50day	0.31	0.29	0.32
3G
	bam+/+	bam+/-	bam-/-			bam+/+	bam+/-	bam-/-			bam+/+	bam+/-	bam-/-
10day	1.67	1.64	1.72		10day	1.75	1.72	1.78		10day	1.77	1.77	1.69
30day	1.51	1.56	1.49		30day	1.43	1.48	1.48		30day	1.41	1.39	1.38
50day	1.02	0.89	0.97		50day	0.94	1.01	0.99		50day	0.97	0.96	0.91
3H
	bam+/+	bam+/-	bam-/-			bam+/+	bam+/-	bam-/-			bam+/+	bam+/-	bam-/-
10day	0.23	0.19	0.21		10day	0.19	0.18	0.19		10day	0.16	0.18	0.19
30day	0.15	0.17	0.16		30day	0.18	0.16	0.17		30day	0.16	0.17	0.16
50day	0.15	0.14	0.15		50day	0.13	0.13	0.14		50day	0.12	0.13	0.12
4A
		4	10	20			4	10	20				4	10	20
	WT	17.6	26.1	33.1		WT	16.9	25.8	32.9			WT	18.2	26.7	31.6
	Gm114 KO	19.3	30.4	44.2		Gm114 KO	20.4	31.2	43.7			Gm114 KO	18.9	29.6	45.5
4C
	WT	0.244		WT	0.256		WT	0.241
	Gm114 KO	0.478		Gm114 KO	0.446		Gm114 KO	0.577
4D
		Diastole	Systole			Diastole	Systole					Diastole	Systole
	WT	85.4	113.5		WT	79.7	106.6				WT	92.6	123.8
	Gm114 KO	90.1	126.6		Gm114 KO	82.4	122.4				Gm114 KO	99.4	128.7
4E
	WT	63.12		WT	67.65		WT	59.44
	Gm114 KO	88.56		Gm114 KO	86.541		Gm114 KO	82.24
4F
	WT	37.05		WT	36.47		WT	33.76
	Gm114 KO	50.23		Gm114 KO	55.54		Gm114 KO	48.19
5A
		16s	RP49	16s-rp49	rel
	WT	18.165	15.362	2.803	1
	Gm114 KO	16.95	14.94	2.01	1.73267
		16s	RP49	16s-rp49	rel
	WT	18.552	13.32	5.232	1
	Gm114 KO	18.6412	13.98	4.6612	1.48535
		16s	RP49	16s-rp49	rel
	WT	19.66	15.42	4.24	1
	Gm114 KO	18.6346	15.11	3.52455	1.642
5B
		0day	2day	4day	6day	8day
	WT	0	-0.354	-2.336	-6.319	-9.645
	Gm114 KO	0	-1.648	-8.848	-13.946	-19.292
		0day	2day	4day	6day	8day
	WT	0	-0.285	-2.404	-6.478	-8.911
	Gm114 KO	0	-1.587	-9.105	-14.077	-20.562
		0day	2day	4day	6day	8day
	WT	0	-0.304	-2.547	-6.845	-10.171
	Gm114 KO	0	-1.774	-9.541	-13.518	-18.645
5D		Mock	2% DSS
	WT	7.84	5.66
	Gm114 KO	7.05	3.97
		Mock	2% DSS
	WT	7.91	5.71
	Gm114 KO	7.16	3.84
		Mock	2% DSS
	WT	7.62	5.82
	Gm114 KO	7.24	4.04
S1-A
	bam+/+	bam+/-	bam-/-			bam+/+	bam+/-	bam-/-			bam+/+	bam+/-	bam-/-
10day	1.85	2.05	1.78		10day	2.01	1.95	2.11		10day	1.93	2.12	2.04
30day	1.87	1.78	1.91		30day	1.93	1.85	1.87		30day	1.89	1.91	1.93
50day	1.45	1.53	1.43		50day	1.47	1.42	1.52		50day	1.46	1.31	1.41
S1-B
	bam+/+	bam+/-	bam-/-			bam+/+	bam+/-	bam-/-			bam+/+	bam+/-	bam-/-
10day	4.58	4.65	4.13		10day	4.24	4.51	4.42		10day	4.31	4.72	4.15
30day	3.98	4.12	4.02		30day	4.03	3.87	3.89		30day	3.96	3.91	4.01
50day	3.03	2.96	3.15		50day	2.98	2.96	2.93		50day	2.87	2.85	2.91
s2-A
	WT	W1118		WT	W1118		WT	W1118
Tnf	1	1.78		1	2.09		1	2.14
s2-B
	WT	W1118		WT	W1118		WT	W1118
IL6	1	4.06		1	3.82		1	4.27
						7
