# Supplementary material for: A conserved role of bam in maintaining metabolic homeostasis via regulating intestinal microbiota in Drosophila
Source: PeerJ journal article supplement (doi:10.7717/peerj.14145), 2022-10-10
Supplement: Original_WB.pdf [file Original_WB.pdf]

## Figure S2

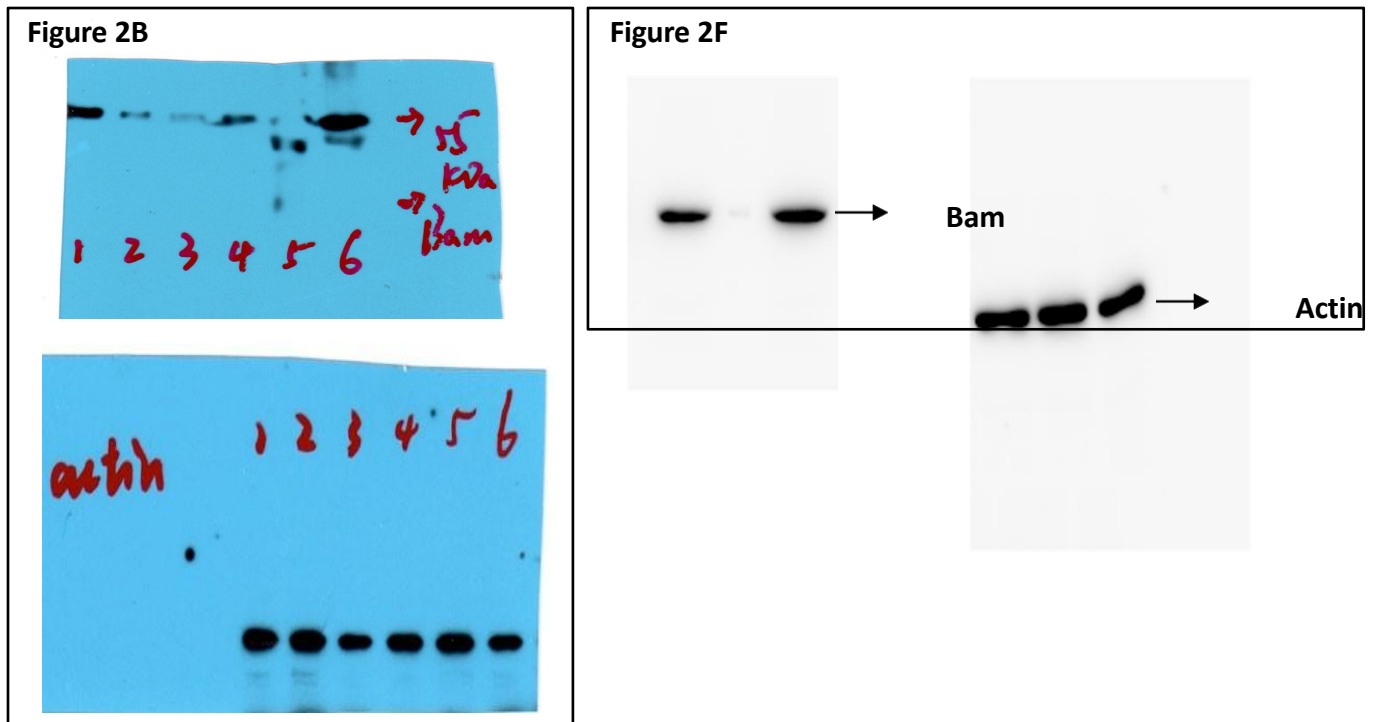

Figure S2. Original western blots in the main Figure 2B and 2F.
